# Supplementary material
Source: PubMed Central journal article supplement (PMC3117250)
Supplement: NIHMS302656-supplement-Supplemental1.pdf [file NIHMS302656-supplement-Supplemental1.pdf]

## Supplemental Digital Content file 1

Each Element in the mixing matrix,  $p_{ij}$ , denotes the proportion of relationships reported by respondents in age group  $i$  with someone in age group  $j$ .  $Q$  is Gupta et al's  $Q$  [20], as statistic of assortativity. SD = standard deviation, based on 10000 bootstrap replications with replacement.

---

### Age Mixing Matrix for Casual Partners

---

|                          |  | Casual Partner's Age |         |         |         |         |         |         |         |         |                  |     |
|--------------------------|--|----------------------|---------|---------|---------|---------|---------|---------|---------|---------|------------------|-----|
| Men's Age                |  | <20                  | [20,25) | [25,30) | [30,35) | [35,40) | [40,45) | [45,50) | [50,55) | [55,60) | >=60             | n   |
| <20                      |  | 0.89                 | 0.11    | 0.00    | 0.00    | 0.00    | 0.00    | 0.00    | 0.00    | 0.00    | 0.00             | 81  |
| [20,25)                  |  | 0.32                 | 0.63    | 0.04    | 0.01    | 0.00    | 0.00    | 0.00    | 0.00    | 0.00    | 0.00             | 105 |
| [25,30)                  |  | 0.04                 | 0.50    | 0.33    | 0.11    | 0.02    | 0.00    | 0.00    | 0.00    | 0.00    | 0.00             | 54  |
| [30,35)                  |  | 0.00                 | 0.20    | 0.48    | 0.32    | 0.00    | 0.00    | 0.00    | 0.00    | 0.00    | 0.00             | 25  |
| [35,40)                  |  | 0.00                 | 0.10    | 0.00    | 0.60    | 0.20    | 0.10    | 0.00    | 0.00    | 0.00    | 0.00             | 10  |
| [40,45)                  |  | 0.00                 | 0.00    | 0.00    | 0.50    | 0.33    | 0.17    | 0.00    | 0.00    | 0.00    | 0.00             | 6   |
| [45,50)                  |  | 0.33                 | 0.00    | 0.00    | 0.33    | 0.00    | 0.00    | 0.00    | 0.33    | 0.00    | 0.00             | 3   |
| [50,55)                  |  | 0.00                 | 0.00    | 0.00    | 0.00    | 0.00    | 0.00    | 1.00    | 0.00    | 0.00    | 0.00             | 1   |
| [55,60)                  |  | 0.00                 | 0.00    | 0.00    | 0.00    | 0.00    | 0.00    | 0.00    | 0.00    | 1.00    | 0.00             | 1   |
| >=60                     |  | 0.00                 | 0.00    | 0.00    | 0.00    | 0.00    | 0.00    | 0.00    | 0.00    | 0.00    | 1.00             | 1   |
| $Q$ (SD) = 0.393 (0.081) |  |                      |         |         |         |         |         |         |         |         | <b>Total</b> 287 |     |

---

### Age Mixing Matrix for Current Partners

---

|                          |  | Current Partner's Age |         |         |         |         |         |         |         |         |                  |     |
|--------------------------|--|-----------------------|---------|---------|---------|---------|---------|---------|---------|---------|------------------|-----|
| Men's Age                |  | <20                   | [20,25) | [25,30) | [30,35) | [35,40) | [40,45) | [45,50) | [50,55) | [55,60) | >=60             | n   |
| <20                      |  | 0.97                  | 0.03    | 0.00    | 0.00    | 0.00    | 0.00    | 0.00    | 0.00    | 0.00    | 0.00             | 211 |
| [20,25)                  |  | 0.44                  | 0.54    | 0.03    | 0.00    | 0.00    | 0.00    | 0.00    | 0.00    | 0.00    | 0.00             | 311 |
| [25,30)                  |  | 0.05                  | 0.64    | 0.27    | 0.03    | 0.01    | 0.00    | 0.00    | 0.00    | 0.00    | 0.00             | 175 |
| [30,35)                  |  | 0.01                  | 0.21    | 0.61    | 0.15    | 0.02    | 0.00    | 0.00    | 0.00    | 0.00    | 0.00             | 104 |
| [35,40)                  |  | 0.01                  | 0.04    | 0.19    | 0.38    | 0.34    | 0.04    | 0.01    | 0.00    | 0.00    | 0.00             | 80  |
| [40,45)                  |  | 0.00                  | 0.09    | 0.07    | 0.21    | 0.40    | 0.19    | 0.05    | 0.00    | 0.00    | 0.00             | 43  |
| [45,50)                  |  | 0.00                  | 0.00    | 0.00    | 0.07    | 0.14    | 0.41    | 0.28    | 0.07    | 0.03    | 0.00             | 29  |
| [50,55)                  |  | 0.00                  | 0.00    | 0.00    | 0.07    | 0.00    | 0.13    | 0.40    | 0.33    | 0.07    | 0.00             | 15  |
| [55,60)                  |  | 0.00                  | 0.00    | 0.00    | 0.00    | 0.07    | 0.00    | 0.00    | 0.67    | 0.27    | 0.00             | 15  |
| >=60                     |  | 0.00                  | 0.00    | 0.00    | 0.00    | 0.14    | 0.07    | 0.07    | 0.07    | 0.00    | 0.64             | 14  |
| $Q$ (SD) = 0.330 (0.029) |  |                       |         |         |         |         |         |         |         |         | <b>Total</b> 997 |     |

**Age Mixing Matrix for Current Wives**

---

**Current Wife's Age**

| <b>Men's Age</b> | <20  | [20,25) | [25,30) | [30,35) | [35,40) | [40,45) | [45,50) | [50,55) | [55,60) | >=60 | N  |
|------------------|------|---------|---------|---------|---------|---------|---------|---------|---------|------|----|
| <20              | 0.00 | 0.00    | 0.00    | 0.00    | 0.00    | 0.00    | 0.00    | 0.00    | 0.00    | 0.00 | 0  |
| [20,25)          | 0.00 | 1.00    | 0.00    | 0.00    | 0.00    | 0.00    | 0.00    | 0.00    | 0.00    | 0.00 | 1  |
| [25,30)          | 0.00 | 1.00    | 0.00    | 0.00    | 0.00    | 0.00    | 0.00    | 0.00    | 0.00    | 0.00 | 1  |
| [30,35)          | 0.00 | 0.00    | 0.33    | 0.67    | 0.00    | 0.00    | 0.00    | 0.00    | 0.00    | 0.00 | 6  |
| [35,40)          | 0.00 | 0.00    | 0.13    | 0.38    | 0.50    | 0.00    | 0.00    | 0.00    | 0.00    | 0.00 | 8  |
| [40,45)          | 0.00 | 0.00    | 0.00    | 0.17    | 0.67    | 0.17    | 0.00    | 0.00    | 0.00    | 0.00 | 6  |
| [45,50)          | 0.00 | 0.00    | 0.06    | 0.13    | 0.13    | 0.56    | 0.13    | 0.00    | 0.00    | 0.00 | 16 |
| [50,55)          | 0.00 | 0.00    | 0.00    | 0.00    | 0.00    | 0.10    | 0.60    | 0.30    | 0.00    | 0.00 | 10 |
| [55,60)          | 0.00 | 0.00    | 0.00    | 0.00    | 0.00    | 0.11    | 0.33    | 0.56    | 0.00    | 0.00 | 9  |
| >=60             | 0.00 | 0.00    | 0.00    | 0.00    | 0.00    | 0.00    | 0.06    | 0.03    | 0.29    | 0.63 | 35 |

**Total 92**

Q (SD) = 0.265 (0.069)

**Age Mixing Matrix for Former Wives or Partners**

---

**Former Wife or Partner Age**

| <b>Men's Age</b> | <20  | [20,25) | [25,30) | [30,35) | [35,40) | [40,45) | [45,50) | [50,55) | [55,60) | >=60 | N  |
|------------------|------|---------|---------|---------|---------|---------|---------|---------|---------|------|----|
| <20              | 0.94 | 0.06    | 0.00    | 0.00    | 0.00    | 0.00    | 0.00    | 0.00    | 0.00    | 0.00 | 51 |
| [20,25)          | 0.46 | 0.46    | 0.08    | 0.00    | 0.00    | 0.00    | 0.00    | 0.00    | 0.00    | 0.00 | 59 |
| [25,30)          | 0.04 | 0.44    | 0.44    | 0.08    | 0.00    | 0.00    | 0.00    | 0.00    | 0.00    | 0.00 | 25 |
| [30,35)          | 0.00 | 0.11    | 0.33    | 0.50    | 0.06    | 0.00    | 0.00    | 0.00    | 0.00    | 0.00 | 18 |
| [35,40)          | 0.00 | 0.07    | 0.13    | 0.60    | 0.20    | 0.00    | 0.00    | 0.00    | 0.00    | 0.00 | 15 |
| [40,45)          | 0.00 | 0.00    | 0.00    | 0.00    | 0.67    | 0.00    | 0.33    | 0.00    | 0.00    | 0.00 | 3  |
| [45,50)          | 0.00 | 0.20    | 0.00    | 0.00    | 0.20    | 0.40    | 0.20    | 0.00    | 0.00    | 0.00 | 5  |
| [50,55)          | 0.00 | 0.00    | 0.00    | 0.00    | 0.00    | 0.00    | 0.00    | 0.75    | 0.25    | 0.00 | 4  |
| [55,60)          | 0.00 | 0.00    | 0.00    | 0.00    | 0.00    | 0.00    | 0.00    | 1.00    | 0.00    | 0.00 | 1  |
| >=60             | 0.00 | 0.00    | 0.00    | 0.00    | 0.00    | 0.00    | 0.33    | 0.00    | 0.00    | 0.67 | 6  |

**Total 187**

Q (SD) = 0.351 (0.050)

---

**Age Mixing Matrix for Casual Partners**

---

**Casual Partner's Age**

| <b>Women's Age</b> | <20  | [20,25) | [25,30) | [30,35) | [35,40) | [40,45) | [45,50) | [50,55) | [55,60) | >=60 | N            |            |
|--------------------|------|---------|---------|---------|---------|---------|---------|---------|---------|------|--------------|------------|
| <20                | 0.23 | 0.70    | 0.06    | 0.00    | 0.00    | 0.00    | 0.00    | 0.00    | 0.00    | 0.00 | 47           |            |
| [20,25)            | 0.04 | 0.42    | 0.49    | 0.04    | 0.00    | 0.01    | 0.00    | 0.00    | 0.00    | 0.00 | 76           |            |
| [25,30)            | 0.00 | 0.02    | 0.44    | 0.25    | 0.25    | 0.04    | 0.00    | 0.00    | 0.00    | 0.00 | 48           |            |
| [30,35)            | 0.00 | 0.00    | 0.00    | 0.27    | 0.50    | 0.12    | 0.12    | 0.00    | 0.00    | 0.00 | 26           |            |
| [35,40)            | 0.00 | 0.00    | 0.00    | 0.00    | 0.58    | 0.25    | 0.17    | 0.00    | 0.00    | 0.00 | 12           |            |
| [40,45)            | 0.00 | 0.00    | 0.00    | 0.00    | 0.14    | 0.43    | 0.29    | 0.14    | 0.00    | 0.00 | 7            |            |
| [45,50)            | 0.00 | 0.00    | 0.00    | 0.00    | 0.00    | 0.14    | 0.57    | 0.14    | 0.14    | 0.00 | 7            |            |
| [50,55)            | 0.00 | 0.00    | 0.00    | 0.00    | 0.00    | 0.00    | 0.00    | 0.60    | 0.20    | 0.20 | 5            |            |
| [55,60)            | 0.00 | 0.00    | 0.00    | 0.00    | 0.00    | 0.00    | 0.00    | 0.00    | 0.00    | 1.00 | 2            |            |
| >=60               | 0.00 | 0.00    | 0.00    | 0.00    | 0.00    | 0.00    | 0.00    | 0.00    | 0.33    | 0.67 | 3            |            |
|                    |      |         |         |         |         |         |         |         |         |      | <b>Total</b> | <b>233</b> |

$Q (SD) = 0.357 (0.059)$

---

**Age Mixing Matrix for Current Partners**

---

**Current Partner's Age**

| <b>Women's Age</b> | <20  | [20,25) | [25,30) | [30,35) | [35,40) | [40,45) | [45,50) | [50,55) | [55,60) | >=60 | N            |             |
|--------------------|------|---------|---------|---------|---------|---------|---------|---------|---------|------|--------------|-------------|
| <20                | 0.23 | 0.62    | 0.12    | 0.02    | 0.00    | 0.00    | 0.00    | 0.00    | 0.00    | 0.00 | 334          |             |
| [20,25)            | 0.00 | 0.41    | 0.46    | 0.11    | 0.01    | 0.01    | 0.00    | 0.00    | 0.00    | 0.00 | 645          |             |
| [25,30)            | 0.00 | 0.01    | 0.41    | 0.41    | 0.11    | 0.03    | 0.02    | 0.00    | 0.00    | 0.00 | 429          |             |
| [30,35)            | 0.00 | 0.00    | 0.02    | 0.41    | 0.38    | 0.14    | 0.04    | 0.00    | 0.00    | 0.00 | 240          |             |
| [35,40)            | 0.00 | 0.00    | 0.00    | 0.02    | 0.33    | 0.46    | 0.13    | 0.03    | 0.03    | 0.01 | 159          |             |
| [40,45)            | 0.00 | 0.00    | 0.00    | 0.01    | 0.08    | 0.36    | 0.28    | 0.19    | 0.04    | 0.04 | 83           |             |
| [45,50)            | 0.00 | 0.00    | 0.00    | 0.00    | 0.02    | 0.02    | 0.34    | 0.43    | 0.14    | 0.06 | 65           |             |
| [50,55)            | 0.00 | 0.00    | 0.00    | 0.00    | 0.03    | 0.03    | 0.07    | 0.45    | 0.28    | 0.14 | 29           |             |
| [55,60)            | 0.00 | 0.00    | 0.00    | 0.00    | 0.00    | 0.00    | 0.00    | 0.00    | 0.40    | 0.60 | 15           |             |
| >=60               | 0.00 | 0.00    | 0.00    | 0.00    | 0.00    | 0.00    | 0.00    | 0.00    | 0.00    | 1.00 | 13           |             |
|                    |      |         |         |         |         |         |         |         |         |      | <b>Total</b> | <b>2012</b> |

$Q (SD) = 0.371 (0.021)$

---

**Age Mixing Matrix for Current Husbands**

---

**Current Husband's Age**

| <b>Women's Age</b> | <20  | [20,25) | [25,30) | [30,35) | [35,40) | [40,45) | [45,50) | [50,55) | [55,60) | >=60 | n          |
|--------------------|------|---------|---------|---------|---------|---------|---------|---------|---------|------|------------|
| <20                | 0.00 | 0.67    | 0.33    | 0.00    | 0.00    | 0.00    | 0.00    | 0.00    | 0.00    | 0.00 | 3          |
| [20,25)            | 0.00 | 0.18    | 0.55    | 0.18    | 0.00    | 0.09    | 0.00    | 0.00    | 0.00    | 0.00 | 11         |
| [25,30)            | 0.00 | 0.00    | 0.05    | 0.38    | 0.38    | 0.10    | 0.10    | 0.00    | 0.00    | 0.00 | 21         |
| [30,35)            | 0.00 | 0.00    | 0.00    | 0.17    | 0.45    | 0.22    | 0.10    | 0.03    | 0.00    | 0.03 | 69         |
| [35,40)            | 0.00 | 0.00    | 0.00    | 0.00    | 0.17    | 0.46    | 0.28    | 0.05    | 0.01    | 0.02 | 95         |
| [40,45)            | 0.00 | 0.00    | 0.00    | 0.00    | 0.00    | 0.19    | 0.48    | 0.21    | 0.07    | 0.04 | 98         |
| [45,50)            | 0.00 | 0.00    | 0.00    | 0.00    | 0.00    | 0.01    | 0.32    | 0.38    | 0.23    | 0.06 | 100        |
| [50,55)            | 0.00 | 0.00    | 0.00    | 0.00    | 0.01    | 0.00    | 0.01    | 0.39    | 0.44    | 0.14 | 77         |
| [55,60)            | 0.00 | 0.00    | 0.00    | 0.00    | 0.00    | 0.00    | 0.00    | 0.00    | 0.38    | 0.63 | 32         |
| >=60               | 0.00 | 0.00    | 0.00    | 0.00    | 0.00    | 0.00    | 0.00    | 0.00    | 0.03    | 0.97 | 58         |
| <b>Total</b>       |      |         |         |         |         |         |         |         |         |      | <b>564</b> |

$Q (SD) = 0.202 (0.021)$

---

**Age Mixing Matrix for Former Husbands or Partners**

---

**Former Husband or Partner Age**

| <b>Women's Age</b> | <20  | [20,25) | [25,30) | [30,35) | [35,40) | [40,45) | [45,50) | [50,55) | [55,60) | >=60 | n         |
|--------------------|------|---------|---------|---------|---------|---------|---------|---------|---------|------|-----------|
| <20                | 0.50 | 0.50    | 0.00    | 0.00    | 0.00    | 0.00    | 0.00    | 0.00    | 0.00    | 0.00 | 2         |
| [20,25)            | 0.00 | 0.30    | 0.60    | 0.10    | 0.00    | 0.00    | 0.00    | 0.00    | 0.00    | 0.00 | 10        |
| [25,30)            | 0.00 | 0.00    | 0.75    | 0.13    | 0.13    | 0.00    | 0.00    | 0.00    | 0.00    | 0.00 | 8         |
| [30,35)            | 0.00 | 0.00    | 0.00    | 0.50    | 0.25    | 0.19    | 0.06    | 0.00    | 0.00    | 0.00 | 16        |
| [35,40)            | 0.00 | 0.00    | 0.00    | 0.00    | 0.46    | 0.23    | 0.31    | 0.00    | 0.00    | 0.00 | 13        |
| [40,45)            | 0.00 | 0.00    | 0.00    | 0.00    | 0.00    | 0.25    | 0.75    | 0.00    | 0.00    | 0.00 | 4         |
| [45,50)            | 0.00 | 0.00    | 0.00    | 0.00    | 0.00    | 0.00    | 0.17    | 0.83    | 0.00    | 0.00 | 6         |
| [50,55)            | 0.00 | 0.00    | 0.00    | 0.00    | 0.00    | 0.00    | 0.00    | 0.50    | 0.50    | 0.00 | 4         |
| [55,60)            | 0.00 | 0.00    | 0.00    | 0.00    | 0.00    | 0.00    | 0.00    | 0.00    | 0.00    | 0.00 | 0         |
| >=60               | 0.00 | 0.00    | 0.00    | 0.00    | 0.00    | 0.00    | 0.00    | 0.00    | 0.00    | 1.00 | 1         |
| <b>Total</b>       |      |         |         |         |         |         |         |         |         |      | <b>64</b> |

$Q (SD) = 0.381 (0.089)$
