# Supplementary material
Source: PubMed Central journal article supplement (PMC3117250)
Supplement: NIHMS302656-supplement-Supplemental2.pdf [file NIHMS302656-supplement-Supplemental2.pdf]

## Supplemental Digital Content file 2

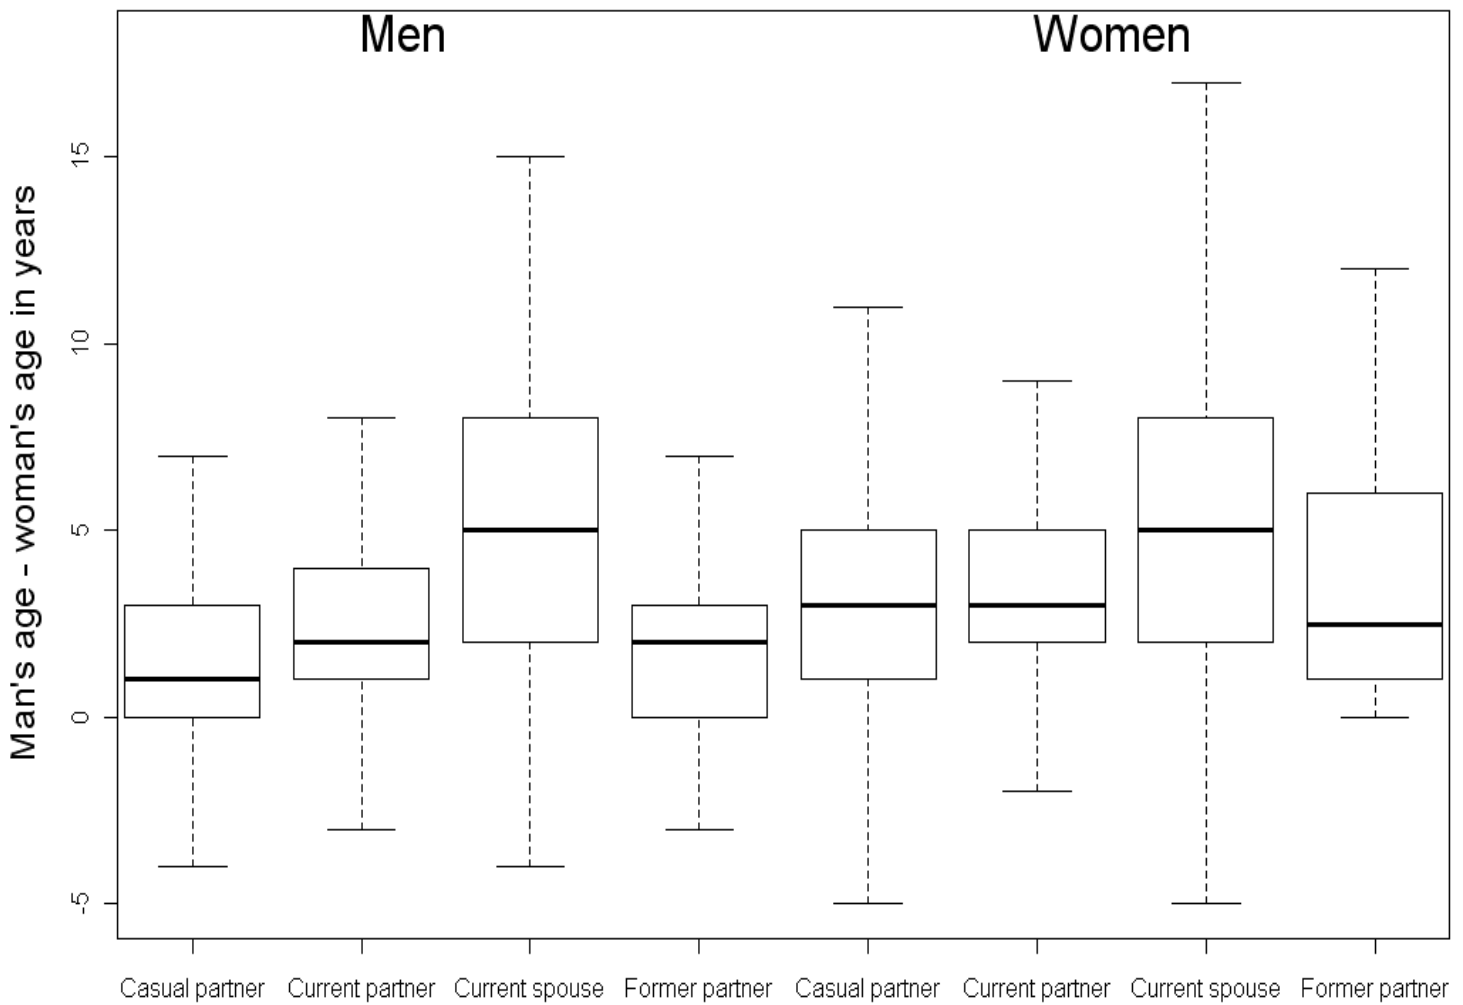

Bold center line is the median age-gap. Box is inter-quartile range. Whiskers encompass values within 1.5 times the inter-quartile range. Median age-gaps for men in relationships with a casual partner, current partner, current spouse, or former partner are 2, 2, 5, and 2 respectively. Median age-gaps for women in relationships with a casual partner, current partner, current spouse, or former partner are 3, 3, 5, and 2.5 respectively.
